# Supplementary material for: Nitrogen and Warming Control the Vegetation in Inner Mongolia Tourist Area
Source: Copernicus journal article supplement (doi:10.5194/se-2016-52), 2016-03-22
Supplement: Supplementary file [file se-2016-52-RC2-supplement.pdf]

---

## Comments

Overall, there are logical problems in this paper. In particular, there is no detailed description on reaction of the vegetation to temperature, humidity and climate as well as the absorption of minerals. If the characteristics of the vegetation itself as well as the difference between the several kinds of vegetation are not well displayed, readers will not be able to understand the changes of the research object properly. Therefore, it is recommended that detailed information on vegetation be supplemented.

Besides, more sufficient argument needs to be added to the discussion part based on the results of the study; some content are mentioned in comparison with other literatures, however, the detailed source of the related literatures or studies is not provided.

Following are the detailed comments the reviewers made:

1. “five year period from March, 2011 to March, 2015” – the data seems confused, please check and make correction.
2. “147757.39 seeds were collected by 64 collectors” - why is the number with decimal place?
3. “The average density of the seed rain is  $1229.6 \pm 145.8 \text{ grain} \cdot \text{m}^{-2} \cdot \text{a}^{-2}$ ”- what does  $a$  refer to?
4. As for figure 1, what are the corresponding dominant species to the four set of data, please illustrate it in the figure.
5. For “2010-2012” in figure 4, it was not mentioned in the previous section.
